# Eficiencia hidráulica y ambiental de cubiertas verdes en un clima mediterráneo continental seco. Aplicación a una nueva urbanización en la ciudad de Zaragoza (España)

## *Hydraulic and environmental performance of green roofs in a continental Mediterranean dry climate. Application in a new urbanization of Zaragoza city (Spain)*

Jiménez, A.<sup>a1\*</sup>, Russo, B.<sup>a2</sup>, Ruiz, O.<sup>a3</sup>, Acero, A.<sup>a4</sup>

<sup>a</sup>Grupo de Ingeniería Hidráulica y Ambiental (GIHA). Escuela Politécnica de La Almunia (EUPLA). Universidad de Zaragoza. c/ Mayor 5 · 50100 La Almunia de Doña Godina (Zaragoza), España.

E-mail: <sup>a1</sup> andrea.jimenez@eupla.es, <sup>a2</sup>brusso@unizar.es, <sup>a3</sup>oruz@unizar.es, <sup>a4</sup>acero@unizar.es

\*Autor para correspondencia

Recibido: 30/07/2020

Aceptado: 27/03/2021

Publicado: 30/04/2021

**Citar como:** Jiménez, A., Russo, B., Ruiz, O., Acero, A. 2021. Hydraulic and environmental performance of green roofs in a continental Mediterranean dry climate. Application in a new urbanization of Zaragoza city (Spain). *Ingeniería del agua*, 25(2), 127-144. <https://doi.org/10.4995/ia.2021.14112>

## RESUMEN

El aumento paulatino de las zonas impermeables en muchas de nuestras ciudades contribuye al aumento de los volúmenes de escorrentía superficial que, además, llegan a la red de drenaje o directamente al medio receptor sin ningún tipo de filtro proporcionado por la vegetación. En este contexto, exacerbado por los efectos de cambio climático que en muchas zonas del planeta están determinando un drástico aumento de las intensidades máximas de lluvia, los Sistemas Urbanos de Drenaje Sostenible (SUDS) constituyen una válida alternativa para hacer frente a estas problemáticas aportando, además, una larga serie de co-beneficios a nivel ambiental y social. El objetivo del presente estudio es plantear la implantación de cubiertas verdes en una nueva urbanización de la ciudad de Zaragoza y valorar sus beneficios hidráulicos, ambientales y socioeconómicos. El análisis de los beneficios hidráulicos y ambientales se ha realizado a través del software USEPA-SWMM5 que incluye un módulo específico para cubiertas verdes, permitiendo definir sus capas principales y sus efectos a nivel de parcela y de cuenca de estudio. A nivel hidrológico, las simulaciones llevadas a cabo para eventos de lluvia extremos (periodos de retorno de 2, 5 y 10 años), indican que la reducción de las puntas del hidrograma puede estar entre 31 y 38%, mientras la reducción en términos de volúmenes de escorrentía presenta un rango entre 17 y 27%. Con respecto a las simulaciones continuas de una serie anual de lluvia, la reducción de volúmenes de escorrentía variaría aproximadamente entre el 30% y el 37% dependiendo de la tipología de cubierta verde empleada. Finalmente, con relación a los parámetros de calidad de los caudales vertidos, la reducción de contaminantes sería muy significativa variando de un 92% a un 99% en función del tipo de contaminante y tipo de cubierta.

**Palabras clave** | sistemas urbanos de drenaje sostenibles, cubiertas verdes, especies vegetales, modelización.

## ABSTRACT

*Different hydroclimatology researchers apply eigenvectors-based techniques to compress large volumes of information while preserving the invariant structure of the original data. This research developed a methodology applying one of these techniques, Principal Component Analysis, on the elements of variability in hydroclimatic time series, and then to identify clusters with the “k-means” method. The result is a regionalized map by variable. Finally, these maps are intersected, obtaining areas with a homogeneous hydroclimatic structure, because the variables have similarity in their variance structure. In the case study, 8 variables were evaluated for Colombia (9268 time series), obtaining as a result 26 hydroclimatic regions. Obtaining hydroclimatically homogeneous regions. The progressive increment of impervious areas in many of our cities contributes to the increase of surface runoff volumes that, moreover, reach the drainage network or, directly, the receiving water bodies without any type of filter provided by the vegetation.*

*In this context, that in several sites could be exacerbated by the effects of climate change that are determining a drastic increase of maximum rainfall intensities, Sustainable Urban Drainage Systems (SUDS) suppose a valid alternative to address these kinds of problems, and providing, at the same time, a long series of other co-benefits at environmental and social level. The objective of this study is to propose the implementation of green roofs in a new urbanization of the city of Zaragoza and assess their hydraulic, environmental and socioeconomic benefits. The analysis of the hydraulic and environmental benefits has been performed through the USEPA-SWMM5 software that includes a specific module for SUDS simulations with special regard to green roofs, allowing to define and fully characterize their main layers and to simulate their effects at local or catchment scale. The hydrological simulations carried out for extreme rainfall events (return periods of 2, 5 and 10 years), indicate that the reduction of the hydrograph peaks can be between 31 y 38%, while the reduction in terms of runoff volumes is ranged from 17 up to 27 %. Concerning the simulation of a continuous annual rainfalls' series, the reduction in runoff volumes would vary approximately between 30% and 37% depending on the type of green roof used. Finally, regarding the water quality parameters of the sewer discharged overflows, the reduction of pollutants would be very significant, varying from 92% to 99% depending on the type of pollutant and the type of roof.*

**Key words** | Sustainable Urban Drainage Systems (SUDS), green roofs, vegetation type, modelling.

## INTRODUCCIÓN

El estudio presentado en este artículo nace de la necesidad de dar respuestas a los nuevos retos de la gestión del drenaje urbano, con la finalidad de reducir los impactos sociales, económicos y ambientales generados por el fenómeno del rápido crecimiento urbanístico y poblacional de nuestras ciudades debido a que se espera que el 68% de la población mundial resida en zonas urbanas en 2050 (UN DESA, 2018). De hecho, el continuo y rápido crecimiento de las ciudades, así como el cambio de las condiciones climáticas que en muchos sitios del planeta está significando un aumento en la frecuencia de las precipitaciones extremas, ha propiciado un aumento del número de inundaciones y de desbordamientos de los sistemas de saneamiento (DSS) con vertidos al medio receptor de caudales procedentes de redes unitarias o separativas sin tratamiento previo, tanto durante episodios de lluvia extremos como moderados, provocado principalmente por la sustitución de suelos vegetados por superficies impermeables (Abas y Hashim, 2014).

En tales circunstancias, las soluciones basadas en la naturaleza, como las infraestructuras verdes y, en el caso del drenaje urbano, los Sistemas Urbanos de Drenaje Sostenible (SUDS), también conocidos, por sus siglas en inglés, como LID (*Low Impact Developments* – Desarrollos de bajo impactos), BMP (*Best Management Practices* – Mejores prácticas de gestión), WSUD (*Water Sensitive Urban Design* – Diseño urbano sensible al agua) (Fletcher *et al.*, 2014), contribuyen a mejorar la gestión de las aguas pluviales urbanas y constituyen una válida alternativa a las soluciones tradicionalmente empleadas para hacer frente a los desafíos en este sector aportando, además, una larga serie de beneficios a nivel ambiental, social, estético, energético y económico (Locatelli *et al.*, 2020).

Hoy en día, la evaluación socioeconómica de la implementación de los SUDS es una herramienta esencial para la planificación del drenaje urbano y la toma de decisiones de las estrategias de adaptación al cambio climático (Zhou *et al.*, 2012).

En este contexto, se presenta este estudio con el principal objetivo de evaluar la eficiencia hidráulica y ambiental de una potencial implementación de tejados verdes en una nueva urbanización de la ciudad de Zaragoza (España) con especial atención a las especies que puedan usarse en dichos tejados en función de la climatología del entorno considerado.

Los tejados verdes se definen como una superficie de un edificio o construcción que se encuentra cubierta de vegetación parcial o totalmente (Morales-Mojica *et al.*, 2017).

Los beneficios de los tejados verdes han sido ampliamente estudiados y, hoy en día, estas tecnologías se emplean con una función ecológica como mejorar el hábitat y la biodiversidad de zonas urbanas y disminuir el consumo de energía (Minke y Lagrotta, 2004; Eva, 2008), o con una función económica y ambiental como reducción de la escorrentía generada en hasta un 75% (Andrés-Doménech *et al.*, 2018; Peng y Stovin, 2017). Finalmente, además de su función hidráulica y ambiental, estos sistemas favorecen el control térmico y la reducción de ruido en edificios y pueden tener efectos en la mejora de la calidad de aire (Vijayaraghavan, 2016).

La técnica de los tejados verdes trata de reproducir, lo más fielmente posible, la situación del terreno previa a la impermeabilización. Para el análisis del comportamiento hidráulico y ambiental de esta técnica se ha empleado el software *Storm Water Model Management* (SWMM) de la Agencia Norteamericana de Medio Ambiente (*United States Environmental Protection Agency*, USEPA) que, en su nueva versión 5.1, incluye un módulo específico para la simulación de Sistemas Urbanos de Drenaje Sostenibles (SUDS) como las cubiertas verdes.

Este estudio ha permitido estimar los beneficios potenciales de la implementación de cubiertas verdes en un caso concreto, en términos de disminución de la escorrentía superficial (en picos y en volumen) y de los contaminantes asociados a los desbordamientos del sistema de saneamiento, así como en los ahorros energéticos y económicos que supone la eventual disminución del volumen tratado por la EDAR.

## MATERIAL Y MÉTODOS

La zona de estudio objeto de la posible implementación de tejados verdes se encuentra en la localidad de Zaragoza, perteneciente a la Comunidad de Aragón, en el Norte de España. Se trata de una superficie a urbanizar de 262 ha (Figura 1).

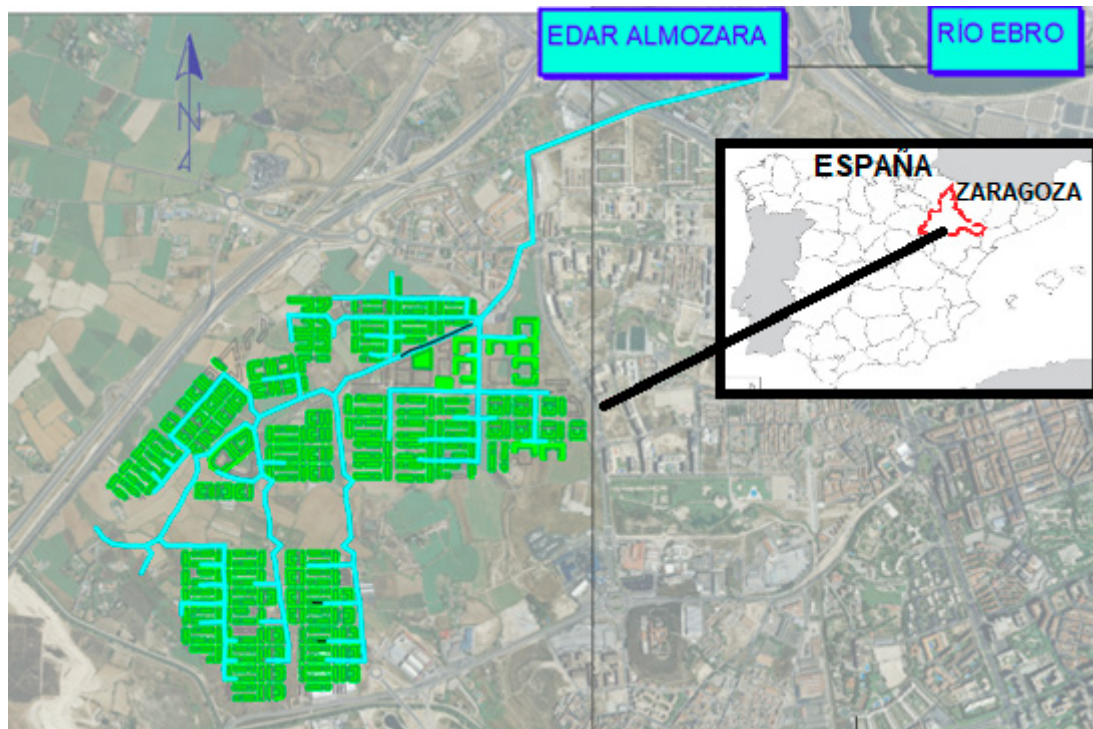

Figura 1 | Zona de estudio en Zaragoza.

La ciudad de Zaragoza se caracteriza por tener un clima mediterráneo continental seco, o “clima árido”, con precipitaciones escasas, inferiores a 322 mm de precipitación anual acumulada (AEMET, 2013) e irregulares y con temporadas de máximos en primavera y otoño y mínimos muy marcados en verano e invierno. Las temperaturas varían de forma importante a lo largo del año, con temperaturas de verano favorecidas por el progresivo calentamiento de las masas de aire del interior de la Península, llegando fácilmente a los 24 y 25 °C con máximas mayores de 35 °C. El invierno se caracteriza por largos periodos de frío intenso, con valores de temperatura medios en enero inferiores a 5 °C, con frecuentes heladas de inversiones térmicas por estancamiento del aire frío invernal, acompañado muchas veces por nieblas de irradiación. Existe una gradación hacia un ambiente más seco hacia la zona central.

A nivel urbanístico, en la actualidad, la ciudad de Zaragoza está implementando mejoras en la Ordenanza Municipal para la Ecoeficiencia y la calidad Integral del agua. Estas mejoras pasan por realizar un análisis económico en el empleo de sistemas de drenaje sostenible en una zona piloto de la ciudad, con el objetivo de dar cumplimiento al RD 1290/2012 y, además, su objetivo es posicionar la ciudad de Zaragoza como ciudad pionera en este ámbito reforzando la estrategia de su promoción como ciudad verde e inteligente (FNCA, 2015).

## Clasificación de los tejados verdes

La tecnología de los tejados verdes consiste en superponer capas en las cubiertas de los edificios con el fin de conseguir un suelo apto para el crecimiento de determinadas especies vegetales, así como mejorar las propiedades respecto a las cubiertas convencionales. Se pueden diferenciar cinco capas identificadas en la Figura 2: capa impermeable, capa protectora, capa drenante, capa filtrante y capa vegetal.

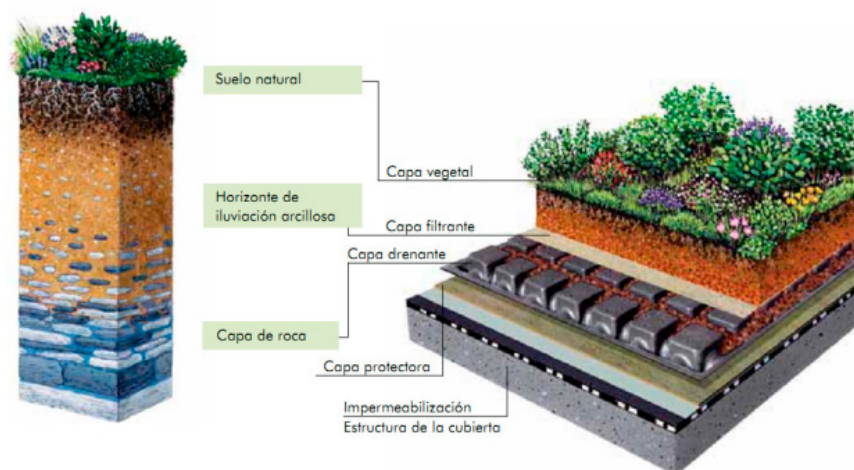

**Figura 2** | Capas de una cubierta verde (Fuente: Zinco cubiertas ecológicas, 2019).

Además, existen tres tipos de cubiertas verdes: intensiva, semi-intensiva y extensiva. Los diferentes tipos de cubiertas verdes requieren diferente vegetación, así como diferentes capas vegetales (Banting *et al.*, 2005).

Las cubiertas extensivas actúan como una capa con funciones ecológicas y tienen beneficios tanto ambientales como económicos sobre los costes de mantenimiento del edificio donde se implantan y, además, sirven de aislante térmico (Tolderlund *et al.*, 2010). Este sistema es el más ligero de todos y el más barato, siendo el mejor para instalar en los tejados de difícil acceso o en los de gran pendiente, hasta 25° (GRG, 2005). El espesor del sustrato está dentro de 9-13 cm y las especies vegetales utilizadas normalmente para esta tipología de cubierta en clima como el mediterráneo continental seco son: *Sedum sediforme* (Jacq.), *Sedum album* (L.), *Cynodon dactylon* (L.) solo, o mezclado con *Festuca arundinacea* (Schreb)

Las cubiertas verdes semi-intensivas representan una combinación de las asociadas a los sistemas intensivos y extensivos. Este sistema es ideal para tejados finos que son parcialmente accesibles. A menudo se incluyen en azoteas con un uso social-recreativo por lo que se le añaden elementos paisajísticos para hacerlos más atractivos. Usualmente estos sistemas se instalan sobre tejados de metal o de hormigón/cemento que pueden soportar el sobrepeso y la membrana impermeable. El espesor del sustrato está dentro de 13-18 cm y las especies vegetales que se adaptan al clima mediterráneo continental desértico de la ciudad de Zaragoza con inviernos fríos y veranos calurosos y secos son: *Abelia x grandiflora* (Rovelli ex André), *Buxus sempervirens* (L.), *Lavandula angustifolia* (Mill), *Rosmarinus officinalis* (L.), *Thymus spp* (L.).

La instalación de cubiertas verdes intensivas es comparable a la construcción de un jardín en una cubierta ya que proporcionan beneficios similares a los de pequeños parques o jardines domésticos. Por eso, a menudo, se denominan también cubiertas ajardinadas. Dado que la variedad vegetal es más amplia que en las capas extensivas, suponen mayores cargas estructurales y espesores de sustrato para retener más agua y mantener la vegetación. Además, el mantenimiento ha de ser periódico, con tareas habituales de jardinería como cortar el césped, abonar, regar o escardar. El espesor del sustrato está dentro de 18-61 cm y las especies vegetales utilizadas en climas mediterráneos continentales secos son *Juniperus x media* (L.), *Albizzia julibrissin* (Durazz), *Prunus cerasifera atropurpurea* (Ehrh) y *Cercis silicuastrum* (L.).

## Datos hidrológicos

Para el análisis de la eficiencia de las cubiertas verdes se han empleado lluvias sintéticas con diferentes periodos de retorno y una serie histórica de lluvia continua diez-minutal correspondiente al año 2013. Los datos han sido recogidos por la estación pluviométrica ubicada en el aeropuerto de Zaragoza a 4.70 km de la zona de estudio.

Para el cálculo de las lluvias sintéticas se ha empleado la serie histórica que contiene datos de precipitación diaria tomados durante 74 años, desde enero 1941 hasta diciembre de 2016.

Para la elección de la lluvia continua se ha tenido en cuenta la precipitación histórica anual acumulada, de la cual se extrae que la serie correspondiente al año 2013 (con 382 mm), aun siendo ligeramente superior a la media histórica, puede considerarse como un año pluviométrico medio de la ciudad también considerando el número anual de eventos de lluvia (Figura 3).

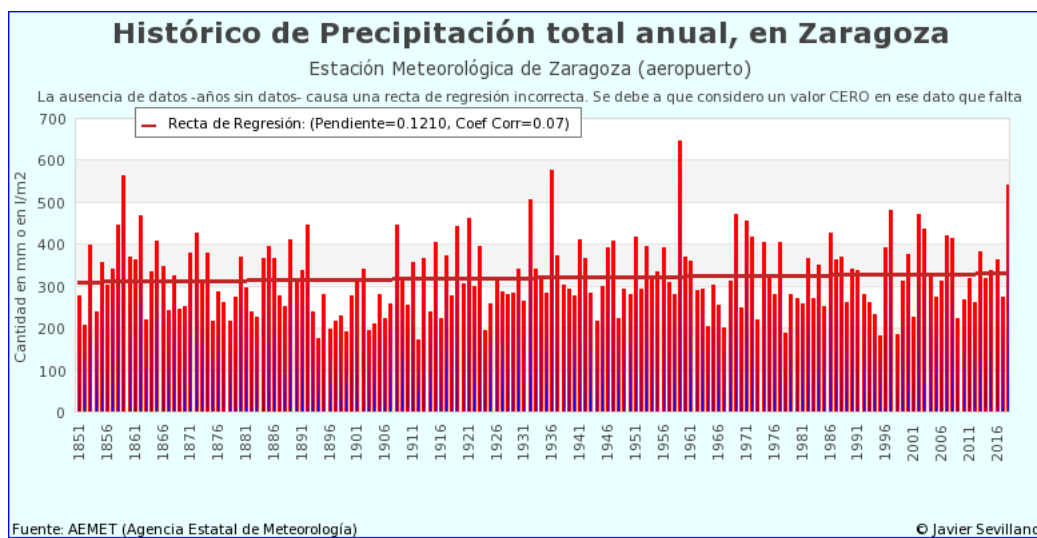

**Figura 3** | Histórico de precipitación anual en Zaragoza. (Fuente: Sevillano, 2019).

En este caso de estudio, además de la pluviometría, es relevante la consideración del fenómeno de la evapotranspiración. La evapotranspiración ha sido obtenida de la página web de la Oficina del Regante de Aragón, la cual toma datos de la estación Matañana, ubicada a 10.75 km de la zona de estudio y que dispone de la evapotranspiración potencial (ET<sub>0</sub>) calculada con el método de Blaney-Criddle (Blaney, 1959). A partir de los datos diarios se obtiene una media mensual correspondiente al año 2013 como se muestra en la Tabla 1.

**Tabla 1** | Valores de evapotranspiración mensual del 2013 (Fuente: Gobierno de Aragón, 2013).

|                          | ENE  | FEB  | MAR  | ABR  | MAY  | JUN  | JUL  | AGO | SEP  | OCT  | NOV  | DIC |
|--------------------------|------|------|------|------|------|------|------|-----|------|------|------|-----|
| ET <sub>0</sub> (mm/día) | 1.07 | 1.74 | 2.82 | 4.08 | 5.01 | 6.15 | 6.27 | 5.7 | 4.27 | 2.57 | 1.92 | 0.6 |

## Modelo de simulación hidrológica e hidráulica

El modelo *Storm Water Model Management* (SWMM v.5.1) es un software de modelización hidrológica e hidráulica de gestión de aguas pluviales diseñado por la USEPA (*United States Environmental Protection Agency*). En la última versión de este software (versión 5.1) se ha incluido un nuevo módulo específico para el modelado de sistemas urbanos de drenaje sostenibles como las cubiertas verdes que en la herramienta se denominan como *Low Impact Developments* (LIDs) y que se caracterizan a través de lo que el programa llama LID Controls.

SWMM permite modelizar 7 tipos de SUDS diferentes: áreas de bioretención, jardines de lluvia, cubiertas verdes, pavimentos permeables, zanjas filtrantes, depósito de lluvia y cunetas verdes.

Para caracterizar una cubierta verde, es necesario definir las variables de superficie ocupada por la cubierta, porcentaje de saturación inicial del sustrato, área impermeable y destino del flujo de salida.

El modelo divide las cubiertas verdes en 3 capas: superficie (caracterizada por la altura de la berma, volumen de vegetación, rugosidad de la superficie y pendiente), sustrato (caracterizado por el espesor, porosidad, capacidad de campo y punto de marchitez, conductividad hidráulica, pendiente de la conductividad y altura de succión) y lámina drenante (caracterizada por el espesor, fracción de hueco y rugosidad).

Hidráulicamente el modelo emplea 5 ecuaciones que representan el comportamiento del agua en el tejado (Figura 4) (Peng y Stovin, 2017).

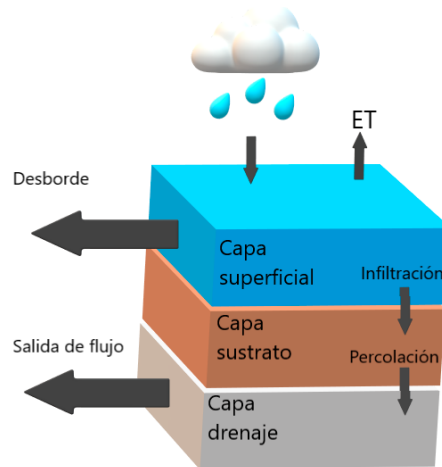

**Figura 4** | Esquema configuración cubiertas verdes.

La ecuación (1) determina el caudal de agua que fluye, en su caso, por la superficie de la cubierta empleando la fórmula de Manning (1890) para régimen uniforme, las ecuaciones (2), (3) y (4) determinan la cantidad de agua que se infiltra en el sustrato a partir del método de Green-Ampt (1911), y la (5) determina la cantidad de agua del flujo de salida otra vez empleando la fórmula de Manning.

Ecuación 1. (Cálculo del caudal circulante por unidad de superficie de cuenca)

$$Q_s = S_1^{1/2} / nAWD^{5/3} \quad (1)$$

Ecuación 2. (Cálculo de la tasa de infiltración)

$$f = k_{\text{sat}} (1 + ((\phi - \theta)\psi) / F) \quad (2)$$

Ecuación 3. (Cálculo de la conductividad hidráulica saturada).

$$k_{\text{sat}} = F - (\phi - \theta) \psi \ln(1 + F / ((\phi - \theta) \psi)) \quad (3)$$

Ecuación 4. (Cálculo tasa de retención del sustrato)

$$f_p = k_{\text{sat}} \exp(-(\phi - \theta) S) \quad (4)$$

Ecuación 5. (Cálculo caudal drenado por unidad de superficie de cuenca)

$$Q_d = (S_1^{1/2} W F_r / N A) d^{5/3} \quad (5)$$

dónde:  $Q_s$  = caudal circulante por unidad de superficie de cuenca;  $S_1$  = pendiente de la superficie;  $n$  = rugosidad;  $A$  = área de flujo;  $w$  = ancho de la subcuenca;  $D$  = profundidad del agua sobre superficie;  $f$  = tasa de infiltración;  $K_{\text{sat}}$  = conductividad hidráulica saturada;  $\theta$  = porosidad del suelo;  $\phi$  = humedad;  $\psi$  = succión;  $F$  = infiltración acumulada (desde 0 a  $t$ ),  $t$  = tiempo,  $f_p$  = tasa de retención del sustrato;  $S$  = pendiente de conductividad;  $Q_d$  = caudal drenado por unidad de superficie de cuenca;  $F_r$  = fracción vacía de la capa de drenaje;  $N$  = rugosidad de la capa de drenaje;  $d$  = profundidad del agua de la capa de drenaje.

A la hora de implantar técnicas de drenaje sostenible (LIDs) en SWMM v5.1, existen dos métodos de modelización diferentes. El primer método trabaja las LIDs en paralelo, no pudiendo recibir aportaciones de otros LIDs, mientras que, en el segundo método, las LID trabajan en serie, es decir, pueden recibir aguas provenientes de sistemas de drenaje sostenible ubicadas aguas arriba. Este sistema es válido en sub-cuencas dónde se implanten varios sistemas de drenaje tales como pavimentos porosos, filtros verdes etc.

Una vez implantado el modelo, el último paso es su calibración y validación. Según varios estudios realizados, debido al gran número de parámetros que se precisan para definir el funcionamiento de las cubiertas verdes en SWMM v5.1 y al alto grado de incertidumbre en la estimación de los valores de dichos parámetros para cada caso, los trabajos de calibración pueden complicarse de forma significativa (Peng y Stovin, 2017).

Con relación a la calidad de agua, SWMM puede simular la generación, entrada y transporte de cualquier número de contaminantes definidos por el usuario. El tipo de contaminación va asociada al uso del suelo y los procesos que determinan la generación de cada contaminante son: acumulación del contaminante sobre la superficie de la cuenca y lavado y arrastre del contaminante desde la cuenca durante los eventos de precipitación para cada tipo de uso de suelo definido (USEPA SWMM, 2015).

En el transporte de la carga contaminante en la red de alcantarillado se producen los procesos de eliminación. La eliminación de contaminantes se define a través de una función de tratamiento que puede ser cualquier expresión matemática que incluya: la concentración de contaminante, la eliminación de otros contaminantes, cualquiera de las varias variables del proceso como el caudal, la profundidad, el tiempo de residencia hidráulica, etc. El resultado de la función de tratamiento puede ser una concentración o una fracción del contaminante eliminada como, por ejemplo, en el caso de la DBO en el cual se define una expresión de decaimiento de primer orden para la obtención de la concentración final.

$$C = BOD \cdot \exp(-0.05 HRT) \quad (6)$$

donde  $C$  es la concentración final,  $BOD$  la concentración de  $DBO$  y  $HRT$  es el tiempo de retención expresado en horas.

SWMM estima la producción de carga contaminante asociada a la escorrentía que, al aplicar cubiertas verdes disminuye y, como consecuencia, genera una disminución también de la contaminación asociada.

En la Figura 5 se observa la propuesta de urbanización de la zona de estudio en función de lo definido en el Plan General de Ordenación Urbana de diciembre de 2007. Para la subdivisión de la cuenca en subcuencas, se han considerado las líneas de flujo existentes en la zona y la proximidad a los futuros pozos de inspección de la red de alcantarillado.

En la Figura 5 se muestra la configuración del modelo realizado en SWMM cuyas principales características son:

- 126 subcuencas, con un área total de 266.7 ha, de las cuales el 21% (56.32 ha) son cubiertas de edificios
- 326 pozos de registro
- 16.03 km de red
- 1 bomba con caudal 0.29 m<sup>3</sup>/s, altura de impulsión 5 m y potencia nominal 30 kW
- 1 tanque de tormentas con volumen de 40 000 m<sup>3</sup> diseñado según criterios de dimensionamiento de depósitos antiDSS empleados por el Ayuntamiento de Zaragoza (Chami, 2014).
- 3 parámetros contaminantes DBO, DQO y SS.

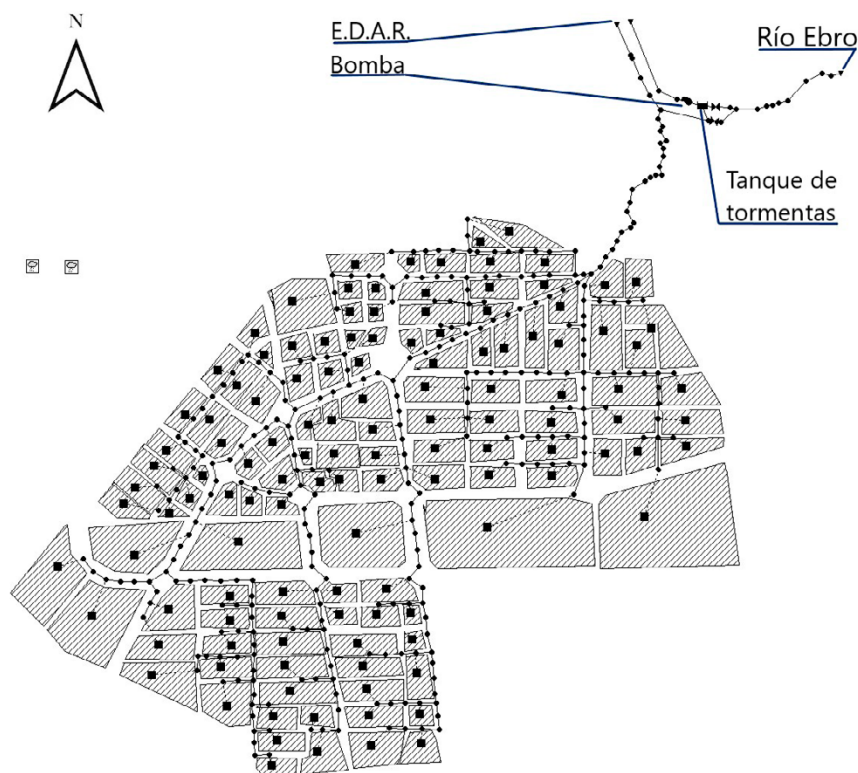

**Figura 5** | Esquema modelo en SWMM.

## Vegetación

Uno de los parámetros más críticos a la hora de plantear la implementación de tejados verdes es la elección de la vegetación, según su adaptabilidad al entorno y su necesidad de mantenimiento.

En el caso de las cubiertas extensivas, las plantas suculentas o crasas son aquellas en las que la raíz, el tallo o las hojas se han engrosado para permitir el almacenamiento de agua en cantidades mucho mayores que en el resto de las plantas. Esta adaptación les permite mantener reservas de agua durante períodos prolongados y sobrevivir en entornos áridos y secos que otras plantas encuentran inhabitables (IPE, 2015).



Las plantas suculentas más utilizadas en las cubiertas verdes son las pertenecientes al género *Sedum*. Son plantas anuales o perennes, proporcionan cobertura vegetal durante todo el año y una amplia variedad de formas de hojas y colores. La mayoría de las especies florecen en mayo y junio y los colores más comunes de flores son de color amarillo o rosa pálido. Son especies fiables y ampliamente utilizadas en cubiertas vegetales. En el caso de Zaragoza, las más comunes son las *Sedum sediforme* (Jacq) y *Sedum Album* (L.), debido a que estas especies toleran el calor extremo y se adaptan a suelos secos (Acero *et al.*, 2018).

En el caso de las cubiertas semi-intensivas, las plantas más utilizadas son las aromáticas y las gramíneas. Las plantas aromáticas son aquellas constituidas principalmente por aceites esenciales. Los suelos de la zona de estudio son calizos y secos en su mayor parte, por lo que son los preferidos por la mayoría de las aromáticas. Son generalmente hierbas, perennes o anuales. Las plantas de este grupo dan diversidad visual, estructural y ecológica a una cubierta verde. En el estudio se ha considerado el uso de: *Thymus vulgaris* (L.), *Lavandula latifolia* (Mill) y *Rosmarinus officinalis* (L). En cuanto al segundo tipo, las plantas gramíneas son la cuarta familia con mayor riqueza de especies. Son plantas herbáceas con un ciclo de vida que puede ser anual, bienal o perenne. Por lo general, son plantas que pueden cubrir grandes superficies en poco período de tiempo (IPE, 2015). Son más susceptibles a grandes variaciones de agua (tanto por escasez como por exceso de agua) que otros tipos de plantas. Por lo general, las plantas indicadas son utilizadas en cubiertas verdes como tapizantes, *Cynodon dactylon* (L.), *Stipa parviflora* (L.).

Para cubiertas intensivas las especies arbóreas seleccionadas han sido: *Acer monspessulanum* (L.), *Albizia julibrissin* (Durazz), *Cercis silicuastrum* (L.), *Cornus* sp. (L.), *Koeleruteria paniculata* (Laxm), *Prunus cerasifera atropurpurea* (Ehrh). Las especies arbóreas han sido elegidas atendiendo criterios de adaptación a las funciones en la cubierta verde, así como a las condiciones climáticas y edafológicas. Estas especies alcanzan una altura media entre 5 y 10 metros, poseen alta resistencia al viento y precisan de una humedad media, por lo que sería necesaria la irrigación de estas.

Otro de los parámetros importantes a la hora de implementar cubiertas verdes es definir el tipo de sustrato por lo cual es necesario considerar la capacidad del suelo y la resistencia de ser lavado. Una composición de sustrato utilizada en casos similares ha sido: grava volcánica y sílice (40%), arena (20%) y el 40% restante corresponde a sustrato de compost el cual posee materia orgánica (13.3%), el nitrógeno total (0.06%) y el fósforo constituido (0.04%) (Andrés-Doménech *et al.*, 2018).

## Aplicación del modelo al caso de estudio

Para evaluar el efecto de las cubiertas verdes frente a una cubierta convencional se consideran 3 escenarios:

- Escenario A que corresponde a la aplicación de cubiertas extensivas en el 50% de la superficie de cubiertas de la nueva urbanización;
- Escenario B que corresponde a la aplicación de cubiertas semi-intensivas en el 50% de la superficie de cubiertas de la nueva urbanización;
- Escenario C que corresponde a la aplicación de cubiertas intensivas en el 50% de la superficie de cubiertas de la nueva urbanización.

El porcentaje del 50%, aunque ambicioso, ha sido considerado como razonable por los autores de este estudio y basado en la consideración que se trata de una nueva urbanización y que, a nivel de ciudad, se están impulsando políticas de implementación de infraestructuras verdes en la línea de lo que se propone en este artículo.

La vegetación considerada en cada una de las cubiertas verdes es la especificada en el punto anterior, mientras los parámetros de modelización empleados son los definidos en la Tabla 2.

El código técnico de la edificación (CTE, 2006) recomienda pendientes entre 1% y 5% para cubiertas planas ajardinadas. En el caso de estudio de este trabajo se ha considerado una pendiente del 3%.

De los procesos que se pueden definir en SWMM, en relación con la calidad del agua, se considera el lavado de contaminantes que asocia la concentración del contaminante con la escorrentía y para ello es necesario definir las concentraciones medias. Con respecto al análisis de contaminación al medio, los parámetros a analizar son: Sólidos Suspendidos (SS), Demanda Bioquímica de oxígeno (DBO) y Demanda química de oxígeno (DQO) asignados al tipo de uso de suelo de tipo residencial.

**Tabla 2** | Parámetros de SWMM para los diferentes escenarios.

| Capa          | Parámetros                                             | Extensivo | Semi-Intensivo | Intensivo | Referencia                  |
|---------------|--------------------------------------------------------|-----------|----------------|-----------|-----------------------------|
| Superficial   | Altura de la berma (mm)                                | 50        | 80             | 100       | Proyecto                    |
|               | Fracción de volumen de vegetación                      | 0.1       | 0.2            | 0.3       | SWMM                        |
|               | Rugosidad (Manning n)                                  | 0.05      | 0.04           | 0.035     | Chow (1959)                 |
|               | Pendiente de la superficie (%)                         | 3         | 3              | 3         | CTE, 2006                   |
|               | Espesor de la capa del suelo (mm)                      | 75        | 150            | 400       | Proyecto                    |
| Suelo         | Porosidad                                              | 0.46      | 0.46           | 0.46      | Carsel and Parrish, 1988    |
|               | Capacidad de campo (cm <sup>3</sup> /cm <sup>3</sup> ) | 0.25      | 0.25           | 0.25      | Schwab <i>et al.</i> , 1996 |
|               | Punto de marchitez (cm <sup>3</sup> /cm <sup>3</sup> ) | 0.11      | 0.11           | 0.11      | Schwab <i>et al.</i> , 1996 |
|               | Conductividad (mm/h)                                   | 2.5       | 2.5            | 2.5       | Carsel and Parrish, 1988    |
|               | Pendiente de la conductividad                          | 5         | 5              | 5         | SWMM                        |
| Capa drenante | Potencial de succión del frente húmedo(mm)             | 88.9      | 88.9           | 88.9      | Rawls et al, 1983           |
|               | Espesor (mm)                                           | 25        | 40             | 60        | ZinCo S. L.                 |
|               | Fracción de vacío                                      | 0.70      | 0.64           | 0.62      | ZinCo S. L.                 |
|               | Rugosidad (Manning n)                                  | 0.3       | 0.26           | 0.52      | ZinCo S. L.                 |

En un estudio nacional sobre la medida de contaminación asociada a las descargas de sistemas unitarios (DSU) de saneamiento al medio receptor (PROMEDSU, Ministerio del Medio Ambiente, 2001), se hallan concentraciones medias asociadas a sucesos de lluvia en muchas ciudades españolas. A partir de esta referencia se han considerado los siguientes parámetros de calidad también para este estudio (Tabla 3).

**Tabla 3** | Concentraciones medias de varios indicadores de contaminación según estudio de PROMEDSU.

| CMS (mg/L)     | Sólidos en suspensión (SS) | Demanda Química de Oxígeno (DQO) | Demanda Bioquímica de Oxígeno (DBO5) |
|----------------|----------------------------|----------------------------------|--------------------------------------|
| Valores medios | 530.6                      | 702.6                            | 320.9                                |

## RESULTADOS

Los resultados que se presentan a continuación muestran los beneficios hidráulicos y ambientales que se obtienen de la implantación de cubiertas verdes como medida de prevención y mitigación de inundaciones en zonas urbanas y de vertidos producidos por desbordamientos de sistemas de saneamiento (DSS) al medio receptor. Los resultados más significativos se consiguen con la implantación de cubiertas verdes intensivas; sin embargo, se demuestra que las cubiertas extensivas ofrecen resultados óptimos si se considera su coste de implantación.

### Lluvias sintéticas T2, T5 y T10 años

Los hidrogramas asociados a unas lluvias sintéticas con periodos de retorno de 2, 5 y 10 años (Figuras 6, 7 y 8) y obtenidos en el punto de salida de la cuenca de estudio, muestran el efecto de atenuación que producen las cubiertas verdes.

En los instantes iniciales de generación de escorrentía, las cubiertas verdes se comportan de forma diferente debido a la saturación inicial considerada en cada caso.

Analizando los resultados obtenidos con una lluvia con periodo de retorno de 10 años, se aprecia la atenuación del caudal punta por efecto de las cubiertas verdes que es de un 38%, pasando de 11.5 m<sup>3</sup>/s en sistemas convencionales a 7.12 m<sup>3</sup>/s en sistemas LID.

**Tabla 4** | Comparación de caudal punta

|                   | Tejado convencional<br>[m <sup>3</sup> /s] | Cubierta verde extensiva<br>[m <sup>3</sup> /s] | Reducción caudal punta en la red<br>% | Cubierta verde semi-intensiva<br>[m <sup>3</sup> /s] | Reducción caudal punta en la red<br>% | Cubierta verde intensiva<br>[m <sup>3</sup> /s] | Reducción caudal punta en la red<br>% |
|-------------------|--------------------------------------------|-------------------------------------------------|---------------------------------------|------------------------------------------------------|---------------------------------------|-------------------------------------------------|---------------------------------------|
| Lluvia T= 2 años  | 5.55                                       | 3.69                                            | 33                                    | 3.79                                                 | 31                                    | 3.80                                            | 31                                    |
| Lluvia T=5 años.  | 9.12                                       | 5.71                                            | 37                                    | 5.82                                                 | 36                                    | 5.83                                            | 36                                    |
| Lluvia T=10 años. | 11.50                                      | 7.12                                            | 38                                    | 7.17                                                 | 37                                    | 7.19                                            | 37                                    |

Respecto al volumen de escorrentía, se aprecian variaciones significantes en la utilización o no de técnicas LID, así como el rendimiento entre los diferentes tipos de cubiertas, Tabla 5.

**Tabla 5** | Volumen de escorrentía.

|                  | Tejado convencional<br>[m <sup>3</sup> /s] | Cubierta verde extensiva<br>[m <sup>3</sup> /s] | Reducción escorrentía en la red<br>% | Cubierta verde semi-intensiva<br>[m <sup>3</sup> /s] | Reducción escorrentía en la red<br>% | Cubierta verde intensiva<br>[m <sup>3</sup> /s] | Reducción escorrentía en la red<br>% |
|------------------|--------------------------------------------|-------------------------------------------------|--------------------------------------|------------------------------------------------------|--------------------------------------|-------------------------------------------------|--------------------------------------|
| Lluvia T= 2 años | 41600                                      | 32100                                           | 23                                   | 30400                                                | 27                                   | 30900                                           | 26                                   |
| Lluvia T=5 años  | 52700                                      | 42200                                           | 20                                   | 38700                                                | 27                                   | 39100                                           | 26                                   |
| Lluvia T=10 años | 68700                                      | 56800                                           | 17                                   | 50800                                                | 26                                   | 51400                                           | 25                                   |

Dentro de las técnicas LID estudiadas, para un evento con 10 años de periodo de retorno, la reducción del volumen de escorrentía respecto a la situación de tejados convencionales es de alrededor 17% (56800 m<sup>3</sup>) en cubiertas extensivas, 26% (50800 m<sup>3</sup>) en cubiertas semi-intensivas y 15% (51400 m<sup>3</sup>) en cubiertas intensivas.

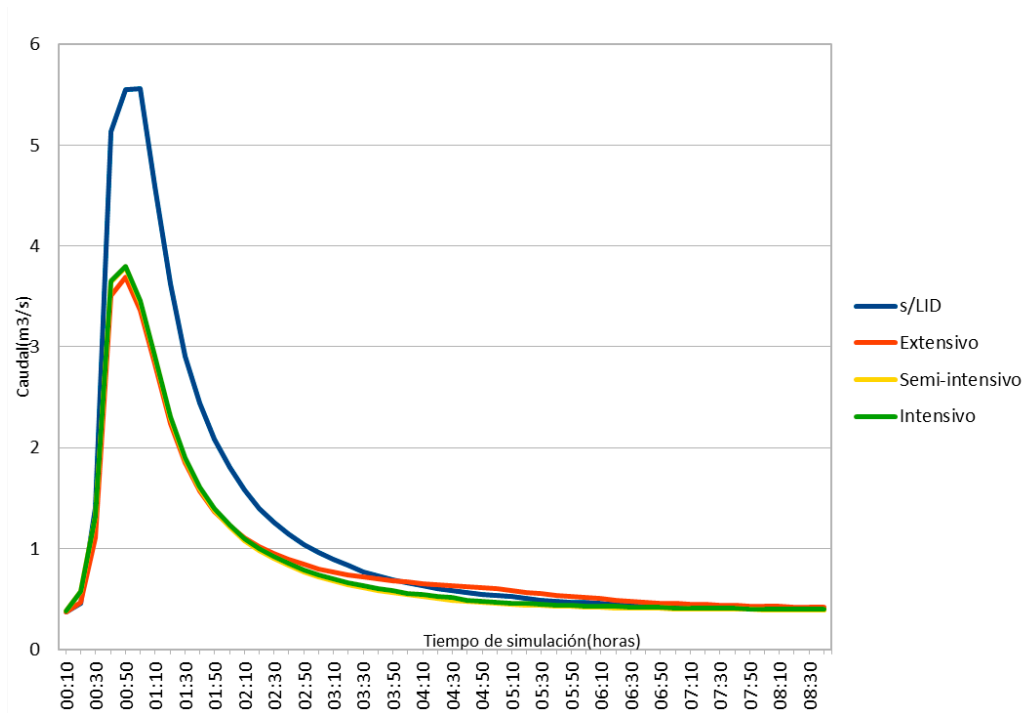**Figura 6** | Hidrograma de salida de una lluvia máxima T = 2 años.

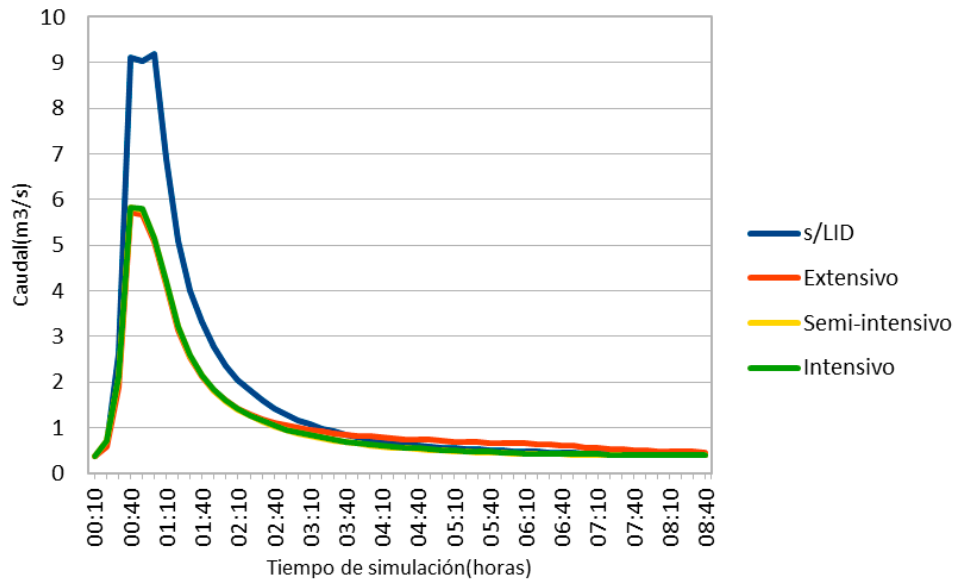

Figura 7 | Hidrograma de salida de una lluvia máxima T = 5 años.

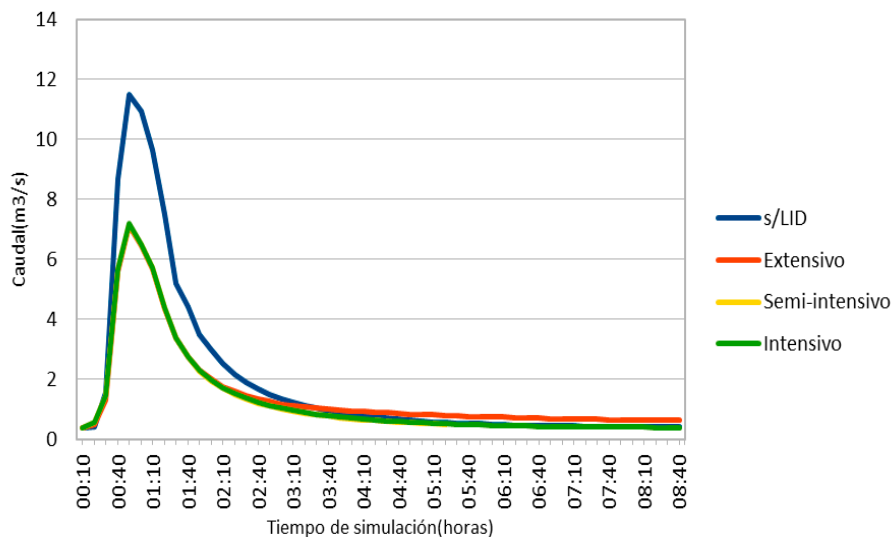

Figura 8 | Hidrograma de salida de una lluvia máxima T = 10 años.

## Serie de lluvia continua

Con respecto a los resultados de simulación continua de una serie anual de lluvia (Tabla 6), se observa que la implementación de tejados verdes produce efectos significativos en la disminución tanto del volumen vertido al medio por las DSS, (61% para tejado verde extensivo, 74% para semi-intensivo y 90% para intensivo), como el vertido a la Estación Depuradora de Aguas Residuales (EDAR) (4% para tejado verde extensivo, 4% semi-intensivo y 4% intensivo), así como el total de volumen bombeado a la misma EDAR (51% para tejado verde extensivo, 60% semi-intensivo y 57% intensivo).

**Tabla 6** | Resultados de simulación de lluvia continua anual de 2013.

|                                   | Tejado convencional<br>[10 <sup>3</sup> m <sup>3</sup> /año] | Cubierta extensiva<br>[10 <sup>3</sup> m <sup>3</sup> /año] | Cubierta semi-intensiva<br>[10 <sup>3</sup> m <sup>3</sup> /año] | Cubierta intensiva<br>[10 <sup>3</sup> m <sup>3</sup> /año] |
|-----------------------------------|--------------------------------------------------------------|-------------------------------------------------------------|------------------------------------------------------------------|-------------------------------------------------------------|
| Nº de eventos de vertido DSU      | 2                                                            | 1                                                           | 1                                                                | 1                                                           |
| Volumen de vertidos DSU           | 74.1                                                         | 28.49                                                       | 19.00                                                            | 7.00                                                        |
| Volumen vertido a EDAR            | 12391.6                                                      | 11930.90                                                    | 11909.00                                                         | 11899.21                                                    |
| Total volumen bombeado en tanques | 576.42                                                       | 280.201                                                     | 227.12                                                           | 246.39                                                      |

Respecto al análisis de los parámetros de calidad de agua, se observa la reducción de contaminantes normalmente presentes en las DSS que ejercen todos los tipos de cubiertas verdes al disminuir el volumen de vertido, con respecto a la posibilidad de no emplear esta técnica. Los valores de contaminación están asociados al flujo, por lo que, si este disminuye, los contaminantes disminuirán proporcionalmente. La Tabla 7 muestra la carga másica presente en la escorrentía.

En particular los resultados obtenidos son:

- Los Sólidos en Suspensión Totales (SST) se reducen un 92% para un tejado verde extensivo, un 95% para un tejado verde semi-intensivo y un 97% para un tejado verde intensivo.
- La Demanda Química de Oxígeno (DQO) se reduce un 97% para un tejado verde extensivo, un 98% para un tejado verde semi-intensivo y un 99% para un tejado verde intensivo.
- La Demanda Bioquímica de Oxígeno (DBO5) se reduce un 95% para un tejado verde extensivo, un 97% para un tejado verde semi-intensivo y un 98% para un tejado verde intensivo.

**Tabla 7** | Carga contaminante y porcentajes de reducción para una lluvia continua anual de 2013.

|                     | Tejado convencional<br>[kg/año] | Cubierta extensiva |      | Cubierta semi-intensiva |      | Cubierta intensiva |      |
|---------------------|---------------------------------|--------------------|------|-------------------------|------|--------------------|------|
|                     |                                 | [kg/año]           | %Red | [kg/año]                | %Red | [kg/año]           | %Red |
| SST vertido por DSU | 4710.61                         | 358.72             | 92   | 227.12                  | 95   | 97.49              | 97   |
| DBO vertido por DSU | 7535.52                         | 215.23             | 97   | 136.27                  | 98   | 58.49              | 99   |
| DQO vertido por DSU | 10928.62                        | 473.52             | 95   | 299.80                  | 97   | 128.69             | 98   |
| SST a EDAR          | 60531.96                        | 50441.04           | 16   | 47783.06                | 21   | 47852.31           | 21   |
| DBO a EDAR          | 96811.94                        | 30264.63           | 68   | 28669.83                | 70   | 28711.38           | 70   |
| DQO a EDAR          | 140434.156                      | 66582.18           | 52   | 63073.64                | 55   | 63165.05           | 55   |

Otro de los factores que se puede destacar como resultado obtenido en el estudio es el importante ahorro energético que podría producir la implementación de cubiertas verdes. De hecho, como primer impacto directo, se reduciría considerablemente la energía consumida por la estación de bombeo del depósito a la EDAR.

Se ha estimado una disminución de energía del 40% (1783 kW·h) en cubiertas extensivas, del 42% (1659 kW·h) en cubiertas semi-intensivas y del 46% (1624 kW·h) en cubiertas intensivas, respecto al sistema convencional (3869 kW·h).

Aunque no se haya tratado en este artículo, habría que añadir también, como ulterior ahorro energético, las mejoras del aislamiento que las cubiertas verdes proporcionan a los edificios.

Para el cálculo del ahorro económico que supone la disminución de las descargas al medio natural, se ha considerado el canon de vertidos establecido en el artículo 113 del texto refundido de la Ley de Aguas y en el anexo IV del Reglamento del Dominio Público Hidráulico (RDPH), según la siguiente fórmula:

$$Canon = V \cdot P_{\text{básico}} \cdot K \quad (7)$$

dónde  $V$  es el volumen anual vertido,  $P_{\text{básico}}$  es el precio básico por metro cúbico (0.016 euros/m<sup>3</sup> en nuestro caso) y  $K$  es un coeficiente de mayoración o minoración, establecido en función de la naturaleza del vertido y la calidad ambiental del medio receptor (vertidos urbanos de hasta 9.999 habitantes equivalentes= 1.14, vertido urbano sin tratamiento adecuado = 2.5 y vertido en zona de categoría II= 1.12, se obtiene un coeficiente de mayoración de 3.19 en nuestro caso).

Además, para evaluar los daños directos producidos al medio ambiente, se considera lo definido en el RDPH, con arreglo a la siguiente fórmula:

$$V \text{ Daño (€)} = CTEC \cdot V \cdot Kpv \quad (8)$$

donde CTEC es el coste del tratamiento del vertido para evitar la contaminación que se establece como 0,12 €/m<sup>3</sup>,  $V$  es el volumen del vertido en metros cúbicos [m<sup>3</sup>],  $Kpv$  es el coeficiente adimensional relativo a la peligrosidad del vertido (1 en nuestro caso).

Como se puede observar en la Tabla 8, el ahorro económico varía entre un 61% y un 90% dependiendo del tipo de cubierta empleada. Este valor no solo representa el coste necesario para la restauración ambiental, sino la disminución de la afección al medio ambiente.

**Tabla 8** | Comparativa económica en la implementación de cubiertas verdes.

|                            | Tejado convencional<br>[€/año] | Cubierta extensiva |       | Cubierta semi-intensiva |       | Cubierta intensiva |       |
|----------------------------|--------------------------------|--------------------|-------|-------------------------|-------|--------------------|-------|
|                            |                                | [€/año]            | %Red  | [€/año]                 | %Red  | [€/año]            | %Red  |
| Canon vertido DSU          | 3980.75                        | 1530.52            | 61.00 | 1020.70                 | 74.00 | 376.04             | 90.00 |
| Valoración de daños al río | 8892.00                        | 3418.80            | 51.61 | 2280.00                 | 74.00 | 840.00             | 90.00 |
| Coste de depuración        | 2850068.00                     | 2744107.00         | 3.70  | 2739070.00              | 3.90  | 2736818.30         | 4.00  |

Por otro lado, se ha cuantificado la reducción económica que se obtiene de los caudales que no llegan a la red de saneamiento y que, por tanto, no son tratados por la estación depuradora. En este caso, se lograrían ahorros de entre 105961 hasta 113249 euros anuales.

Finalmente, en la siguiente tabla se muestra una comparativa entre la precipitación, las pérdidas hidrológicas y la escorrentía en la cuenca para cada tipo de cubierta, obtenida directamente a través del modelo SWMM.

**Tabla 9** | Variables resultado de aplicación lluvia continua.

| Parámetros (Vol ha·m)  | Tipos de cubiertas |           |                |           |
|------------------------|--------------------|-----------|----------------|-----------|
|                        | Convencional       | Extensiva | Semi-intensiva | Intensiva |
| Precipitación          | 161.02             | 160.91    | 160.91         | 160.91    |
| Almacenamiento inicial | 0                  | 0.90      | 1.66           | 5.04      |
| Infiltración           | 52.15              | 62.59     | 62.59          | 62.59     |
| Evapotranspiración     | 24.54              | 37.59     | 43.43          | 45.53     |
| Escorrentía            | 84.68              | 59.83     | 54.89          | 52.79     |

El almacenamiento inicial en cada cubierta crece según el porcentaje de saturación y este, a su vez, está asociado al del volumen de sustrato.

La infiltración aumenta con el uso de técnicas LID, aunque no hay diferencias apreciables entre las mismas y esto se debe a que el suelo empleado, como su capacidad de campo, son las mismas en los tres casos.

Uno de los parámetros de pérdidas que más aumenta es la evapotranspiración que varía según el tipo de vegetación (un 53% para tejados verdes extensivos, un 76% para tejados verdes semi-intensivos y un 85% para tejados verdes intensivos). El aumento de las pérdidas da como resultado la reducción de la escorrentía en un 30% para los tejados verdes extensivos.

## Justificación en el contexto de la normativa actual española sobre suds

Estudios como el que se presenta en este trabajo y otros que se están llevando a cabo en España en los últimos años, junto con ordenanzas municipales y algunas recomendaciones en leyes estatales y autonómica, demuestran el interés creciente para los sistemas urbanos de drenaje sostenible que han sido, históricamente, técnicas poco empleadas en España con respecto a otros países.

En el marco de la Directiva de Inundaciones (Directiva 2007/60/CE) relativa a la “Evaluación y la gestión de los riesgos de inundación”, y su trasposición al ordenamiento jurídico español a través del Real Decreto 903/2010, de 9 de julio, los Planes de Gestión del Riesgo de Inundación (PGRI), como una de las medidas a ejecutar, se menciona la adaptación de “elementos situados en las zonas inundables para reducir las consecuencias adversas en episodios de inundaciones en viviendas, edificios públicos, redes, etc.”. Por otro lado, el Reglamento del Dominio Público Hidráulico (RDPH, Real Decreto 849/1986), en su artículo 126 ter. 7, establece que: “Las nuevas urbanizaciones, polígonos industriales y desarrollos urbanísticos en general, deberán introducir sistemas de drenaje sostenible, tales como superficies y acabados permeables, de forma que el eventual incremento del riesgo de inundación se mitigue. A tal efecto, el expediente del desarrollo urbanístico deberá incluir un estudio hidrológico-hidráulico que lo justifique.”

Finalmente, cabe destacar la reciente publicación del Ministerio para la Transición Ecológica de la “Guías de adaptación al riesgo de inundación: sistemas urbanos de drenaje sostenible” (MITECO, 2019) cuyo objetivo es profundizar en las causas y consecuencias de las inundaciones a nivel urbano y concienciar a la sociedad sobre la necesidad de actuar para prevenirlas y mitigar sus consecuencias a través de este tipo de técnicas.

Como evidenciado por numerosas publicaciones científicas nacionales e internacionales y el creciente número de experiencias recientes en los últimos años, los múltiples beneficios (hidráulicos, ambientales, sociales y económicos) que los sistemas urbanos de drenaje sostenible pueden aportar con respecto a soluciones convencionales, están suponiendo un impulso significativo para que las administraciones de nuestras comunidades, tanto en ámbito municipal como supramunicipal, apuesten, cada día más, para su implementación.

En este contexto, los resultados de este trabajo quieren aportar información concluyente sobre la eficacia y los beneficios muy significativos derivados de una posible implementación de este tipo de técnicas también en una climatología semi-árida como la de la ciudad de Zaragoza.

Zaragoza es la quinta ciudad con más habitantes de España, las primeras cuatro ciudades más pobladas, Madrid, Barcelona, Valencia y Sevilla ya han desarrollado normativa y directrices locales muy pertinentes y específicas en materia de SUDS (Andrés-Doménech *et al.*, 2021).

---

## CONCLUSIONES

El rápido crecimiento de nuestras ciudades (en España el 70% de los habitantes viven en ciudades), pone a prueba la capacidad de sus infraestructuras y servicios urbanos y, en general, su resiliencia frente a episodios de crisis como fenómenos climáticos extremos o de otra naturaleza.

Las cubiertas representan aproximadamente el 40% de las superficies urbanizadas de los núcleos urbanos, por lo que su aprovechamiento como infraestructura verde es necesario por los beneficios que esto conlleva. La aplicación de Sistemas Urbanos de Drenaje Sostenible (SUDS), concretamente las cubiertas verdes, proporcionan una serie de ventajas hidráulicas, ambientales, sociales y económicas.

En el caso de estudio se ha planteado la implementación de tejados verdes en el 50% de los edificios de una nueva urbanización en la ciudad de Zaragoza que supondría una serie de beneficios como la reducción del volumen de escorrentía generado y una disminución de los contaminantes vertidos al medio receptor.

Para eventos sintéticos se obtiene una reducción del caudal punta entre el 31 y el 38% en función del periodo de retorno considerado y de la cubierta empleada, mientras la reducción del volumen está entre el 17 y 27% para los mismos eventos. Con respecto a la simulación de la lluvia continua se obtiene una reducción de la escorrentía generada entre el 30 y el 37%.

Las cubiertas verdes incrementan la infiltración un 20% y la evapotranspiración entre un 53 y 85%, consiguiéndose una reducción del volumen que llega al sistema, lo que conlleva a una importante reducción de tratamiento en las estaciones depuradoras, un 4% en volumen no tratado y un 70% de reducción de la calidad del afluente, así como una disminución en las descargas de contaminantes al medio de entre un 52 y un 97%.

En cuanto a beneficios ambientales, esta técnica disminuye la contaminación vertida al medio de hasta un 91% en cubiertas intensivas. Este efecto se ha asociado al volumen de vertido, ya que no se ha considerado el posible efecto de filtro sobre la escorrentía generada.

Respecto a beneficios económicos, se obtienen reducciones en el coste destinado a la restauración ambiental por causa de vertidos no tratados al medio, así como un ahorro en costes de explotación de estaciones depuradoras que varía entre unos 105961 euros hasta 113249 euros anuales.

Muchas ciudades españolas están desarrollando sus propias normativas y línea guías sobre SUDS, pero la falta de un marco estatal y, especialmente, de estándares nacionales impiden el desarrollo de una estrategia coordinada a escala nacional. En este contexto este trabajo pone de manifiesto de cómo estas técnicas pueden tener una serie de beneficios muy significativos, aunque se implementen en un entorno con un clima mediterráneo continental seco como es la de la ciudad de Zaragoza.

---

## AGRADECIMIENTOS

Los resultados presentados en este artículo proceden de la actividad investigadora del Grupo de Ingeniería Hidráulica y Ambiental (GIHA) de la EUPLA (grupo reconocido y financiado por el Gobierno de Aragón a través del programa “Construyendo Europa desde Aragón”). Los autores, además, agradecen la colaboración del Ayuntamiento de Zaragoza para proporcionar información indispensable al desarrollo del estudio.

---

## REFERENCIAS

- Abas, A.A., Hashim, M. 2014. Change detection of runoff-urban growth relationship in urbanised watershed. *IOP Conference Series: Earth and Environmental Science*, 18, 012040, <https://doi.org/10.1088/1755-1315/18/1/012040>.
- Acero, A., Loren J., Diago J., Perez, J. 2018. Cubiertas Vegetales en Edificios e Infraestructuras. Criterios para la Elección de las Especies En Aragón. *La Convención Técnica y Tecnológica de la Edificación CONTART2018*. 30 de mayo - 1 de junio, Zaragoza, España. 124-148.
- Agencia Estatal de Meteorología, AEMET, 2013. *Datos estadísticos. Selección de estaciones medidoras. Aragón. Periodos 1961-1990, 1981-2010*, Madrid, España.
- Andrés-Doménech, I., Perales-Momparler, S., Morales-Torres, A., Escuder-Bueno, I. 2018. Hydrological Performance of Green Roofs at Building and City Scales under Mediterranean Conditions. *Sustainability*, 10(9), 3105, <https://doi.org/10.3390/su10093105>
- Andrés-Doménech, I., Anta, J., Perales-Momparler, S., Rodríguez-Hernandez, J. 2021. Sustainable Urban Drainage Systems in Spain: A Diagnosis. *Sustainability*, 13(5), 2791, <https://doi.org/10.3390/su13052791>
- Banting, D., Doshi, H. H., Li J., Missios, P. 2005. *Report on the environmental benefits and costs of green roof technology for the city of Toronto City of Toronto and Ontario*. Centres for Excellence Earth and Environmental Technologies. Toronto, Canada.
- Blaney, H. 1959. Monthly consumptive use requirements of irrigated crops. *Journal. Irrigation and. Drainage Division*, 85(1), 1-12. <https://doi.org/10.1061/JRCEA4.0000084>
- Chami, O. 2014. *Dimensionamiento de tanques de Tormenta según nuevos estándares*. Trabajo Fin de Grado de Ingeniería Civil. Escuela Universitaria Politécnica de La Almunia (EUPLA), Universidad de Zaragoza.



- Código Técnico de la Edificación (CTE). 2006. *Documento Básico Salubridad HSI Protección frente a la humedad*. Ministerio de la vivienda, España.
- Directiva 2007/60/CE del Parlamento Europeo y del Consejo, de 23 de octubre de 2007, relativa a la evaluación y gestión de los riesgos de inundación.
- Eva, W. 2008. *Reducing Urban Heat Islands: Compendium of Strategies-Green Roofs*. Environmental Protection Agency (EPA).
- Fletcher, T.D., Shuster, W., Hunt, W.F., Ashley, R., Butler, D., Arthur, S., Trowsdale, S., Barraud, S., Semadeni-Davies, A., Bertrand-Krajewski, J.L., Mikkelsen, P.S., Rivard, G., Uhl, M., Dagenais, D., Viklander, M. 2014. SUDS, LID, BMPs, WSUD and more – The evolution and application of terminology surrounding urban drainage. *Urban Water Journal*, 12(7), 525-542., <https://doi.org/10.1080/1573062X.2014.916314>
- Fundación Nueva Cultura del Agua (FNCA.) 2015. *Jornada técnica sobre la gestión sostenible de las aguas de lluvia en la ciudad de Zaragoza*. 10 de diciembre, Zaragoza, España.
- Gobierno de Aragón, 2013. Datos meteorológicos de la Oficina del Regante de Aragón. Disponible en <https://oficinaregante.aragon.es>. Último acceso: julio de 2020.
- Green, W.H., Ampt, G.A. 1911. Studies on soil physics:1. The flow of air and water through soils. *The Journal of Agricultural Science* 4(1), 1-24. <https://doi.org/10.1017/S0021859600001441>
- Green Roof Guide (GRG). 2015. Disponible en <https://www.greenroofguide.co.uk>. Último acceso: julio 2020.
- Instituto Pirenaico de Ecología, 2015. *Atlas de la Flora de Aragón*. Disponible en <http://www.ipe.csic.es/floragon>. Último acceso: julio 2020.
- Locatelli, L., Guerrero, M., Russo B., Martínez-Gomariz, E., Sunyer, D., Martínez, M. 2020. Socio-Economic Assessment of Green Infrastructure for Climate Change Adaptation in the Context of Urban Drainage Planning. *Sustainability*, 12(9), 3792., <https://doi.org/10.3390/su12093792>
- Manning, R. 1890. *On the Flow of Water in Open Channels and Pipe*. Institution of Civil Engineers of Ireland.
- Ministerio de Medio Ambiente, 2001. *PROMEDSU: Asistencia técnica para la redacción de una experiencia piloto de medida y estudio de las descargas de sistemas unitarios (DSU) del alcantarillado a los medios receptores en tiempos de tormenta en varios municipios españoles*, Madrid, España,
- Ministerio para la Transición Ecológica (MITECO) 2019. *Guías de Adaptación al Riesgo de Inundación: Sistemas Urbanos De Drenaje Sostenible*.
- Minke, G., Lagrotta, D.E. 2004. *Techos verdes. Planificación, ejecución, consejos prácticos*. Montevideo, Uruguay: Fin de siglo.
- Morales-Mojica, J.A., Cristancho-Santos, M.A., Baquero-Rodríguez, G.A. 2017. Tendencias en el diseño, construcción y operación de techos verdes para el mejoramiento de la calidad del agua lluvia. Estado del arte. *Ingeniería del agua*, 21(3), 179. <https://doi.org/10.4995/ia.2017.6939>
- Peng, Z., Stovin, V. 2017. Independent Validation of the SWMM Green Roof Module. *Journal of Hydrologic Engineering*, 22, [https://doi.org/10.1061/\(ASCE\)HE.1943-5584.0001558](https://doi.org/10.1061/(ASCE)HE.1943-5584.0001558)
- Real Decreto 849/1986, de 11 de abril, por el que se aprueba el Reglamento del Dominio Público Hidráulico (RDPH), que desarrolla los títulos preliminar I, IV, V, VI y VII de la Ley 29/1985, de 2 de agosto, de Aguas.
- Real Decreto 903/2010, de 9 de julio, de evaluación y gestión de riesgos de inundación. Boletín Oficial del Estado, 171, de 15 de julio de 2010, 61954 a 61967. Obtenido de <https://www.boe.es/eli/es/rd/2010/07/09/903>.
- Sevillano, J. 2019. *Precipitaciones mensuales y anuales de ciudades españolas*. Disponible en <https://javiersevillano.es/PrecipitacionMediaAnual.htm>. Último acceso: julio de 2020.

Tolderlund, L. 2010. *Design Guidelines and Maintenance Manual for Green Roofs in the Semi-arid and Arid West*. Environmental Protection Agency.

UN DESA, 2018. *The 2018 Revision of World Urbanization Prospects* produced by the Population Division of the UN Department of Economic and Social Affairs. Disponible en <https://www.un.org>. Último acceso: julio de 2020.

United States Environmental Protection Agency, USEPA SWMM, 2015. *Storm Water Management Model User's Manual*. Version 5.1 EPA/600/R-14/413b

Vijayaraghavan, K. 2016. Green roofs: A critical review on the role of components, benefits, limitations and trends. *Renewable and Sustainable Energy Reviews*, 57, 740-752. <https://doi.org/10.1016/j.rser.2015.12.119>

Zhou, Q., Halsnæs, K., Arnbjerg-Nielsen, K. 2012. Economic assessment of climate adaptation options for urban drainage design in Odense, Denmark. *Water Science & Technology*, 66(8), 1812-1820. <https://doi.org/10.2166/wst.2012.386>

ZinCo Cubiertas Ecológicas, S.L. 2019. *Sistemas ZinCo para cubiertas verdes*. Disponible en <https://zinco-cubiertas-ecologicas.es>. Último acceso: julio de 2020.
